# Supplementary material for: Altered distribution and localization of organellar Na+/H+ exchangers in postmortem schizophrenia dorsolateral prefrontal cortex
Source: PubMed Central journal article supplement (PMC9895429; doi:10.1038/s41398-023-02336-2), 2023-02-02
Supplement: 41398_2023_2336_MOESM3_ESM.pdf [file 41398_2023_2336_MOESM3_ESM.pdf]

**Input**

**AQ**

**DT**



PSD95 (Synaptic)

This Western blot shows PSD95 levels. The Input lane has a strong band, the AQ lane has a moderate band, and the DT lane has a strong band.



GAPDH (Cytosolic)

This Western blot shows GAPDH levels. The Input lane has a strong band, the AQ lane has a very strong band, and the DT lane has a moderate band.



**NHE7 (TGN)**

This Western blot shows NHE7 levels. The Input lane has a moderate band, the AQ lane has a very faint band, and the DT lane has a very strong band.



**NHE8 (*cis*-Golgi)**

This Western blot shows NHE8 levels. The Input lane has a moderate band, the AQ lane has a very faint band, and the DT lane has a moderate band.

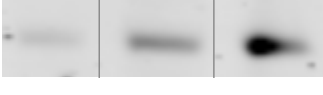

STX6 (Golgi)

This Western blot shows STX6 levels. The Input lane has a moderate band, the AQ lane has a moderate band, and the DT lane has a strong band.



TGN38 (Golgi)

This Western blot shows TGN38 levels. The Input lane has a moderate band, the AQ lane has a moderate band, and the DT lane has a strong band.
