# Supplementary material for: Altered distribution and localization of organellar Na+/H+ exchangers in postmortem schizophrenia dorsolateral prefrontal cortex
Source: PubMed Central journal article supplement (PMC9895429; doi:10.1038/s41398-023-02336-2), 2023-02-02

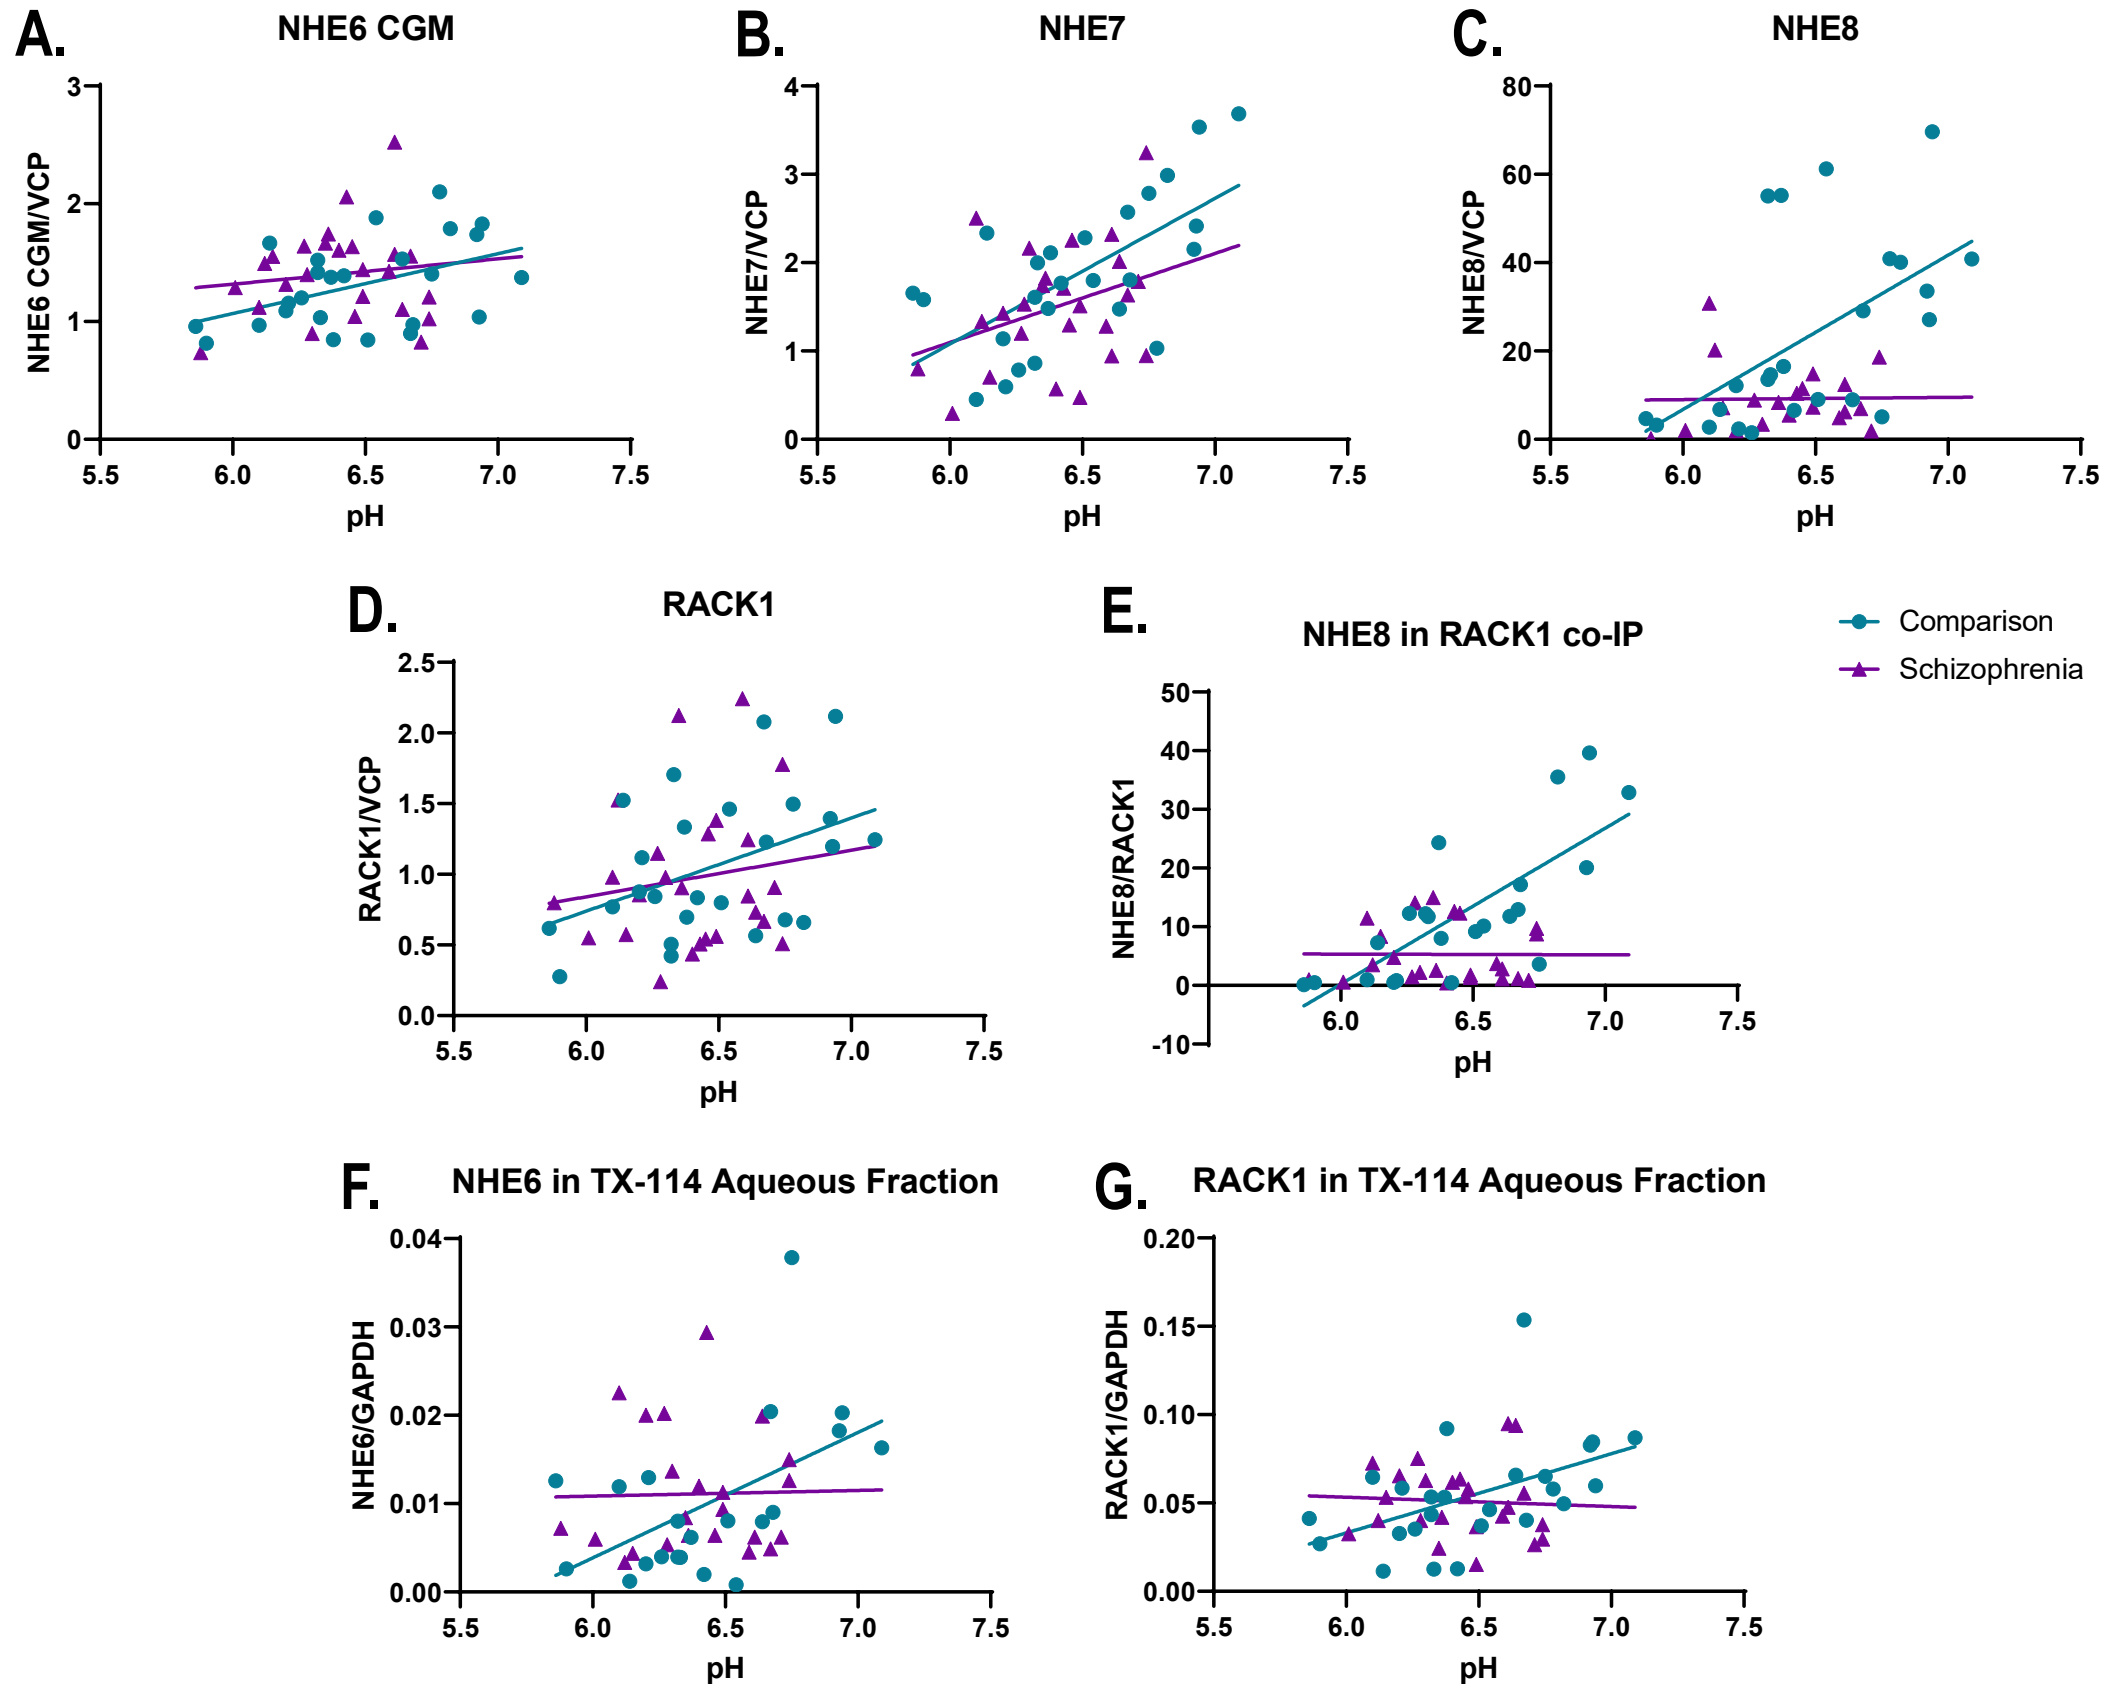

Supplement: 41398_2023_2336_MOESM4_ESM.pdf [file 41398_2023_2336_MOESM4_ESM.pdf]
